# Supplementary material for: Characterization and Expression Profiling Analysis of Calmodulin Genes in Response to Salt and Osmotic Stresses in Pear (Pyrus bretschneideri Rehd.) and in Comparison with Arabidopsis
Source: Biomed Res Int. 2017 Mar 8;2017:7904162. doi: 10.1155/2017/7904162 (PMC5360957; doi:10.1155/2017/7904162)
Supplement: Supplementary file 1 — Table S1. Primers for RT-PCR cloning and qRT-PCR. Table S2. Motif analysis of CaM family members. Table S3. Stress-responsive cis-element analysis of the promoter region of CaM family genes in pear and Arabidopsis. Table S4. Expression of AtCaM genes in response to salt and osmotic stresses. Figure S1. Secondary structure comparison of PbCaMs and AtCaMs. [file 7904162.f1.xlsx]

## Sheet: Sheet1
Table S1. Primers for gene cloning and RT-qPCR
Gene name	Primer sequence(5'-3')	Usage
PbCaM1-F	ATGGCAGATGCATTGACA	Gene cloning
PbCaM1-R	TCAACTGAGCATCATCATC	Gene cloning
PbCaM2-F	GATCAACTGACCGACGAT	Gene cloning
PbCaM2-R	ACTTAGCCATCATCACCTT	Gene cloning
PbCaM3-F	AGCTGACTGACGATCAGA	Gene cloning
PbCaM3-R	TCACTTAGCCATCATCACC	Gene cloning
PbCaM4-F	GAGCAACTAACAGAGGAG	Gene cloning
PbCaM4-R	ACTTGTTGAGCATCATTCT	Gene cloning
PbCaM1-qF	AGGATTCAGATGGACTTAT	RT-qPCR
PbCaM1-qR	AGCACCAATCTCACTTATC	RT-qPCR
PbCaM2-qF	AAGCCTTCAGTCTATTCG	RT-qPCR
PbCaM2-qR	CATTACCATCAGCATCCA	RT-qPCR
PbCaM3-qF	GATGGCGATGGTTGTATC	RT-qPCR
PbCaM3-qR	AGAGTCAGTGTCCTTCAT	RT-qPCR
PbCaM4-qF	ACTAACAGAGGAGCAGAT	RT-qPCR
PbCaM4-qR	ATCAGCATCAACTTCACT	RT-qPCR
ACT2/7-qF	CTCCCAGGGCTGTGTTTCCTA	RT-qPCR
ACT2/7-qR	CTCCATGTCATCCCAGTTGCT	RT-qPCR
UBQ10-qF	TAAGCAGTTGGAGGATGGAA	RT-qPCR
UBQ10-qR	ACGGAGGACAAGGTGAAG	RT-qPCR
