# Supplementary material for: Characterization and Expression Profiling Analysis of Calmodulin Genes in Response to Salt and Osmotic Stresses in Pear (Pyrus bretschneideri Rehd.) and in Comparison with Arabidopsis
Source: Biomed Res Int. 2017 Mar 8;2017:7904162. doi: 10.1155/2017/7904162 (PMC5360957; doi:10.1155/2017/7904162)
Supplement: Supplementary file 2 [file 7904162.f2.xlsx]

## Sheet: Sheet1
Table S2. Motif analysis of CaM family members a
Motif name	Width	Hit sites	Regular expression	Annotationb
MOTIF 1	15	24	MARQMTDTQSSEFKK	No hit
MOTIF 2	50	24	FRVFDKDQNGCISTKELRHVMRSLGQNPTDAEVQDMIREVDVDGNGQINY	Calcium-binding domain
MOTIF 3	6	12	PEFVNV	No hit
MOTIF 4	6	12	FVRMMM	No hit
aMotif detection by The MEME suite (http://meme-suite.org/)
bMotif annotation by PROSITE (http://prosite.expasy.org/)
