# Supplementary material for: Characterization and Expression Profiling Analysis of Calmodulin Genes in Response to Salt and Osmotic Stresses in Pear (Pyrus bretschneideri Rehd.) and in Comparison with Arabidopsis
Source: Biomed Res Int. 2017 Mar 8;2017:7904162. doi: 10.1155/2017/7904162 (PMC5360957; doi:10.1155/2017/7904162)
Supplement: Supplementary file 3 [file 7904162.f3.xlsx]

## Sheet: Sheet1
Table S3. Stress-responsive cis-element analysis of the promoter region of CaM genes in pear and Arabidopsis
Promoter name	Cis-element name	Start position	Strand	Cis-element width	Core sequence	Responses
AtCaM1	ABRE	4	-	9	CCGCGTAGGC	ABA, abiotic stress responsiveness
AtCaM1	ABRE	120	+	6	TACGTG	ABA, abiotic stress responsiveness
AtCaM1	LTR	638	-	6	CCGAAA	Low-temperature
AtCaM1	MBS	718	+	6	TAACTG	Drought, ABA, abiotic-stress responsiveness
AtCaM2	MBS	310	-	6	CAACTG	Drought, ABA, abiotic-stress responsiveness
AtCaM2	W box	23	-	6	TTGACC	Wounding, ABA, Biotic- and abiotic-stress responsiveness
AtCaM3	ABRE	91	+	9	CCTACGTGGC	ABA, abiotic stress responsiveness
AtCaM3	ABRE	94	+	7	ACGTGGC	ABA, abiotic stress responsiveness
AtCaM3	CE3	122	+	10	GACGCGTGTC	Heat, oxidative stress
AtCaM3	MBS	166	-	7	AACCTAA	Drought, ABA, abiotic-stress responsiveness
AtCaM3	HSE	343	+	9	AAAAAATTTC	Heat, oxidative stress
AtCaM4	HSE	297	-	9	AAAAAATTTC	Heat, oxidative stress
AtCaM4	LTR	66	+	6	CCGAAA	Low-temperature
AtCaM4	MBS	239	+	6	CAACTG	Drought, ABA, abiotic-stress responsiveness
AtCaM4	MBS	601	-	6	CAACTG	Drought, ABA, abiotic-stress responsiveness
AtCaM4	MBS	439	-	6	TAACTG	Drought, ABA, abiotic-stress responsiveness
AtCaM4	MBS	474	-	7	AACCTAA	Drought, ABA, abiotic-stress responsiveness
AtCaM6	HSE	387	+	9	AAAAAATTTC	Heat, oxidative stress
AtCaM6	MBS	62	+	6	TAACTG	Drought, ABA, abiotic-stress responsiveness
AtCaM6	MBS	838	+	6	TAACTG	Drought, ABA, abiotic-stress responsiveness
AtCaM6	MBS	430	-	11	AAAAGTTAGTTA	Drought, ABA, abiotic-stress responsiveness
AtCaM7	ABRE	270	+	6	CACGTG	ABA, abiotic stress responsiveness
AtCaM7	HSE	335	-	9	AAAAAATTTC	Heat, oxidative stress
AtCaM7	HSE	582	+	9	AAAAAATTTC	Heat, oxidative stress
AtCaM7	HSE	365	+	9	AAAAAATTTC	Heat, oxidative stress
AtCaM7	HSE	869	+	9	AAAAAATTTC	Heat, oxidative stress
AtCaM7	LTR	103	+	6	CCGAAA	Low-temperature
AtCaM7	MBS	860	+	7	AACCTAA	Drought, ABA, abiotic-stress responsiveness
PbCaM1	MBS	7	-	6	CAACTG	Drought, ABA, abiotic-stress responsiveness
PbCaM1	MBS	820	-	6	CAACTG	Drought, ABA, abiotic-stress responsiveness
PbCaM1	W box	726	+	6	TTGACC	Wounding, ABA, Biotic- and abiotic-stress responsiveness
PbCaM2	MBS	521	-	6	TAACTG	Drought, ABA, abiotic-stress responsiveness
PbCaM2	MBS	260	-	10.5	aaaAaaC(G/C)GTTA	Drought, ABA, abiotic-stress responsiveness
PbCaM2	MBS	114	+	7	AACCTAA	Drought, ABA, abiotic-stress responsiveness
PbCaM3	MBS	842	-	6	TAACTG	Drought, ABA, abiotic-stress responsiveness
PbCaM3	HSE	570	-	9	AAAAAATTTC	Heat, oxidative stress
PbCaM3	HSE	718	+	9	AAAAAATTTC	Heat, oxidative stress
PbCaM3	ABRE	283	+	6	CACGTG	ABA, abiotic stress responsiveness
PbCaM3	LTR	162	+	6	CCGAAA	Low-temperature
PbCaM3	MBS	45	+	6	TAACTG	Drought, ABA, abiotic-stress responsiveness
PbCaM4	HSE	123	+	8	CNNGAANNTTCNNG	Heat, oxidative stress
PbCaM4	HSE	638	+	9	AAAAAATTTC	Heat, oxidative stress
PbCaM4	W box	700	-	6	TTGACC	Wounding, ABA, Biotic- and abiotic-stress responsiveness
PbCaM4	MBS	780	-	6	CAACTG	Drought, ABA, abiotic-stress responsiveness
