# Supplementary material for: Characterization and Expression Profiling Analysis of Calmodulin Genes in Response to Salt and Osmotic Stresses in Pear (Pyrus bretschneideri Rehd.) and in Comparison with Arabidopsis
Source: Biomed Res Int. 2017 Mar 8;2017:7904162. doi: 10.1155/2017/7904162 (PMC5360957; doi:10.1155/2017/7904162)
Supplement: Supplementary file 4 [file 7904162.f4.xlsx]

## Sheet: Sheet1
Table S4. Expression of AtCaM genes in response to salt and osmotic stress
Tissue cluster	Stress	Time	Treatment	Expression value for 246290_at (At3g56800)	Expression value for 249582_at (At5g37780)	Expression value for 252713_at (At3g43810)	Expression value for 260138_at (At1g66410)	Expression value for 267064_at (At2g41110)
Seedling	untreated	0 h	Control: No treatment at all	0.827	0.2164	0.5402	0.2715	0.8803
Seedling	osmotic	0.5 h	Osmotic stress (300 mM Mannitol): Mannitol was added to a concentration of 300 mM in the Media. To add the Mannitol the raft was lifted out. A magnetic stir bar was used to mix the media and the added Manitol. Then the raft was put back in the box. The boxes were put back to the climate camber. Harvested 0,5 h after start of experiment	0.7309	0.1873	0.4981	0.2476	0.7985
Seedling	osmotic	1 h	Osmotic stress (300 mM Mannitol): Mannitol was added to a concentration of 300 mM in the Media. To add the Mannitol the raft was lifted out. A magnetic stir bar was used to mix the media and the added Manitol. Then the raft was put back in the box. The boxes were put back to the climate camber. Harvested 1 h after start of experiment	0.901	0.2465	0.615	0.3509	0.7984
Seedling	osmotic	3 h	Osmotic stress (300 mM Mannitol): Mannitol was added to a concentration of 300 mM in the Media. To add the Mannitol the raft was lifted out. A magnetic stir bar was used to mix the media and the added Manitol. Then the raft was put back in the box. The boxes were put back to the climate camber. Harvested 3 h after start of experiment	1.2717	0.4876	0.4796	0.7244	0.6432
Seedling	osmotic	6 h	Osmotic stress (300 mM Mannitol): Mannitol was added to a concentration of 300 mM in the Media. To add the Mannitol the raft was lifted out. A magnetic stir bar was used to mix the media and the added Manitol. Then the raft was put back in the box. The boxes were put back to the climate camber. Harvested 6 h after start of experiment.	0.8289	0.8963	0.3535	1.129	0.3542
Seedling	osmotic	12 h	Osmotic stress (300 mM Mannitol): Mannitol was added to a concentration of 300 mM in the Media. To add the Mannitol the raft was lifted out. A magnetic stir bar was used to mix the media and the added Manitol. Then the raft was put back in the box. The boxes were put back to the climate camber. Harvested 12 h after start of experiment	0.9456	0.7259	0.3583	1.2177	0.4082
Seedling	osmotic	24 h	Osmotic stress (300 mM Mannitol): Mannitol was added to a concentration of 300 mM in the Media. To add the Mannitol the raft was lifted out. A magnetic stir bar was used to mix the media and the added Manitol. Then the raft was put back in the box. The boxes were put back to the climate camber. Harvested 24 h after start of experiment	0.7271	0.4237	0.291	0.8643	0.3093
Seedling	salt	0.5 h	Salt stress (150 mM NaCl): NaCl was added to a concentration of 150 mM in the Media. To add the NaCl the raft was lifted out. A magnetic stir bar and a stirrer was used to mix the media and the added NaCl. Then the raft was put back in the box. The boxes were put back to the climate camber. Harvested 0,5 h after start of experiment	0.7393	0.1683	0.5494	0.2574	0.6127
Seedling	salt	1 h	Salt stress (150 mM NaCl): NaCl was added to a concentration of 150 mM in the Media. To add the NaCl the raft was lifted out. A magnetic stir bar and a stirrer was used to mix the media and the added NaCl. Then the raft was put back in the box. The boxes were put back to the climate camber. Harvested 1 h after start of experiment	0.8682	0.224	0.5732	0.3353	0.5146
Seedling	salt	3 h	Salt stress (150 mM NaCl): NaCl was added to a concentration of 150 mM in the Media. To add the NaCl the raft was lifted out. A magnetic stir bar and a stirrer was used to mix the media and the added NaCl. Then the raft was put back in the box. The boxes were put back to the climate camber. Harvested 3 h after start of experiment	0.758	0.4046	0.4549	0.6067	0.2725
Seedling	salt	6 h	Salt stress (150 mM NaCl): NaCl was added to a concentration of 150 mM in the Media. To add the NaCl the raft was lifted out. A magnetic stir bar and a stirrer was used to mix the media and the added NaCl. Then the raft was put back in the box. The boxes were put back to the climate camber. Harvested 6 h after start of experiment	0.7899	0.903	0.7197	0.9592	0.29
Seedling	salt	12 h	Salt stress (150 mM NaCl): NaCl was added to a concentration of 150 mM in the Media. To add the NaCl the raft was lifted out. A magnetic stir bar and a stirrer was used to mix the media and the added NaCl. Then the raft was put back in the box. The boxes were put back to the climate camber. Harvested 12 h after start of experiment	0.9298	0.7476	0.7901	0.8728	0.3617
Seedling	salt	24 h	Salt stress (150 mM NaCl): NaCl was added to a concentration of 150 mM in the Media. To add the NaCl the raft was lifted out. A magnetic stir bar and a stirrer was used to mix the media and the added NaCl. Then the raft was put back in the box. The boxes were put back to the climate camber. Harvested 24 h after start of experiment	0.9115	0.2796	0.5889	0.5595	0.5634
